# Supplementary material
Source: MDPI journal article supplement (https://www.mdpi.com/2673-687X/2/4/17)
Supplement: s1 [file s1]

## Supplementary Material

# Manufacturing of Carbon Nanotube-Polystyrene Filament for 3D Printing: Nanoparticle Dispersion and Electromagnetic Properties

Kseniya I. Baskakova <sup>1,\*</sup>, Alexander V. Okotrub <sup>1,2</sup>, Lyubov G. Bulusheva <sup>1,2</sup> and Olga V. Sedelnikova <sup>1,2,\*</sup>

<sup>1</sup> Nikolaev Institute of Inorganic Chemistry, Siberian Branch of Russian Academy of Sciences, 630090 Novosibirsk, Russia; spectrum@niic.nsc.ru (A.V.O.); bul@niic.nsc.ru (L.G.B.)

<sup>2</sup> Radiophysics Department, National Research Tomsk State University, 634050 Tomsk, Russia

\* Correspondence: baskakova@niic.nsc.ru (K.I.B.); o.sedelnikova@gmail.com (O.V.S.)

Purified SWCNTs were studied using transmission electron microscopy (TEM) on a JEOL 2010 microscope (JEOL Ltd., Tokyo, Japan). The authors thank Mr. A.V. Ishchenko for the TEM image.

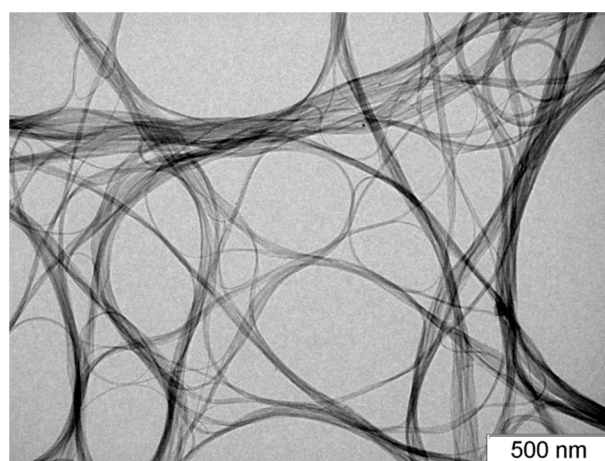

**Figure S1.** TEM image of purified SWCNTs.

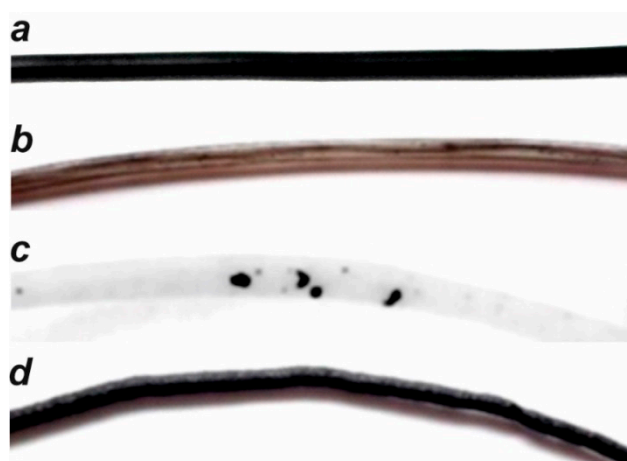

**Figure S2.** Photographs of polymer filaments with 0.1 wt.% SWCNT made from (a) milled base PC, (b) powdered polystyrene granules, (c) mixture of polystyrene and 10% SWCNT masterbatch with single extrusion, (d) mixture of polystyrene and 10% SWCNT masterbatch with multiply extrusion.
