# Supplementary material
Source: MDPI journal article supplement (https://www.mdpi.com/2673-687X/2/4/17)
Supplement: s1 [file s1]

Archive with 1 entries (1 files):
- nanomanufacturing-1924523-supplementary.pdf
